# Supplementary material
Source: PubMed Central journal article supplement (PMC2963354)
Supplement: supp_M110.151340_Supplementary.pdf [file supp_M110.151340_Supplementary.pdf]

### Supplementary table 1

Primers used for q-PCR

| <b>Gene</b>           | <b>Primer</b>                                                 |
|-----------------------|---------------------------------------------------------------|
| murine IL-1 $\beta$   | F: CAACCAACAAGTGATATTCTCCATG<br>R: GATCCACACTCTCCAGCTGCA      |
| murine MIP2           | F: TGA CTTCAAGAACATCCAGAGCTT<br>R: CTTGAGAGTGGCTATGACTTCTGTCT |
| murine TNF $\alpha$   | F: GACCCTCACACTCAGATCAT<br>R: TTGAAGAGAACCTGGGAGTA            |
| murine MTA1           | F: AGTGCGCCTAATCCGTGGTG<br>R: CTGAGGATGAGAGCAGCTTTCG          |
| murine MyD88          | F: TCGAGTTTGTGCAGGAGATG<br>R: AGGCTGAGTGCAAACCTTGGT           |
| murine TLR4           | F: AGTGGGTCAAGGAACAGAAGCA<br>R: CTTACCAGCTCATTCTCACC          |
| murine TLR3           | F: GCTCATTCTCCCTTGCTCAC<br>R: CCCGAAAACATCCTTCTCAA            |
| murine TLR2           | F: GTGCCACCATTTCACGGGC<br>R: CAAAACACTTCCTGCTGGCC             |
| murine INF- $\beta$   | F: TTACTGCTTGGCCATCC<br>R: ACTGTCTGCTGGTGGAGTTCAT             |
| murine $\beta$ -actin | F: TCTACGAGGGCTATGCTCTCC<br>R: TTTGATGTCACGCACGATTCC          |

**Supplementary Table 2**

Primers used for ChIP on murine MyD88 promoter

| <b>Region No.</b> | <b>Region in murine MyD88 promoter</b> | <b>Primer</b>                                              | <b>Size (bp)</b> |
|-------------------|----------------------------------------|------------------------------------------------------------|------------------|
| 1                 | -93 to + 81                            | F: CACAAGTGGGTTGACTTTTAGGCT<br>R: GGCAGGCAACCCTGGGCCCCCGG  | 174              |
| 2                 | -569 to -280                           | F: AATAGATTAACCAAGTGAATTAA<br>R: TATTCTGGTAGTAGGGAGGGAAGAG | 290              |
| 3                 | -1053 to -877                          | F: GAAGGAGGTTTCCCAAACCTTCTGGTT<br>R: ACCCGGGGCTGAGCACAGCAA | 177              |

**Supplementary table 3**

Oligonucleotides used for EMSA on MyD88 promoter

| <b>Site</b> | <b>Region in MyD88 Promoter</b> | <b>oligonucleotide sequence</b>                                |
|-------------|---------------------------------|----------------------------------------------------------------|
| 1           | + 27 to + 37                    | F: GGAAGTAGGAACTCCACAGGCGAGC<br>R: GCTCGCCTGTGGAGTTTCCTACTTCC  |
| 2           | -297 to -306                    | F: CCAGTCTGTCTTCCCTCCCTACTAC<br>R: GTAGTAGGGAGGGAAGAGACAGACTGG |
| 3           | -1040 to -1051                  | F: AAGGTCGTGGGCTTCCCTTTAAAA<br>R: TTTTAAAGGGGAAAGCCCACGACCTT   |
